# Supplementary material
Source: PubMed Central journal article supplement (PMC2638902)
Supplement: djn205_2.pdf [file djn205_2.pdf]

**Supplementary Figure 1.** Infiltration by neutrophils in tumors from FasL-treated mice. Images are presented at lower power (8×) magnification. BALB/c mice ( $n = 3$ ) were injected SC with D2F2 breast carcinoma cells and tissues were subjected to histopathological analyses, as described (14), after 46 days, including H&E staining (upper panel) and staining of neutrophils with anti-Ly-6G antibody (lower panel) of tumors from mice treated IV after 14 days with PBS, *S. typhimurium* (Sal), *S. typhimurium* plus empty vector (Sal+vector) or *S. typhimurium* plus FasL-bearing vector (Sal+FasL). Insert shows higher magnification (150×) of the tumor from FasL-treated mice.
