# Supplementary material
Source: PubMed Central journal article supplement (PMC2638902)

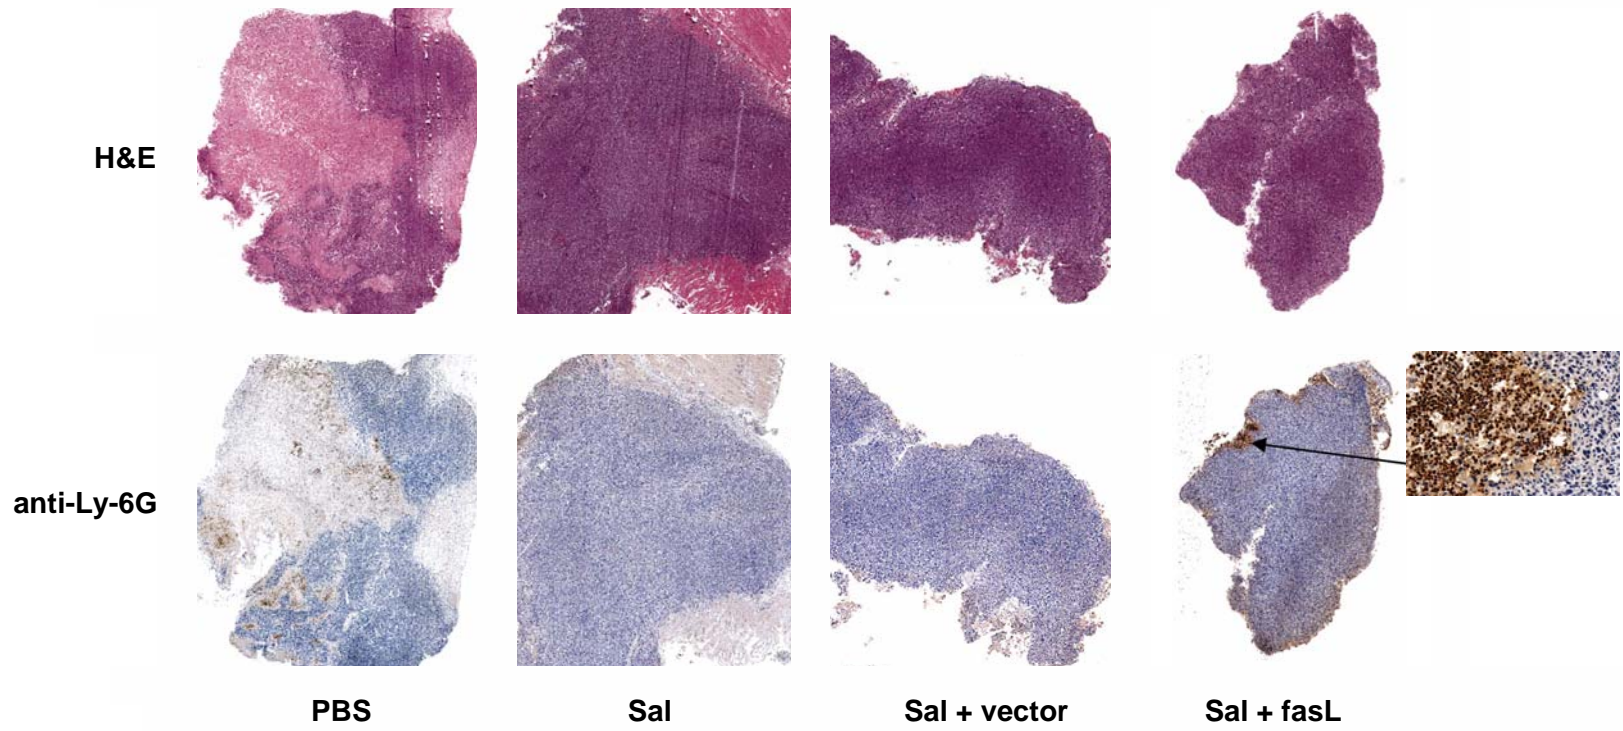

**Supplementary Figure 1**

Supplement: djn205_1.pdf [file djn205_1.pdf]
